# Supplementary material for: Impact of a Novel PagR-like Transcriptional Regulator on Cereulide Toxin Synthesis in Emetic Bacillus cereus
Source: MDPI journal article supplement (doi:10.3390/ijms231911479), 2022-09-29
Supplement: s1 [file s1]

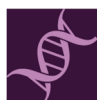

# Supplement

Eva Maria Kalbhenn <sup>1</sup>, Markus Kranzler <sup>1</sup>, Agnieszka Gacek-Matthews <sup>1,†</sup>, Gregor Grass <sup>2</sup>, Timo D. Stark <sup>3</sup>, Elike Frenzel <sup>1,††</sup>, and Monika Ehling-Schulz <sup>1,\*</sup>

<sup>1</sup> Institute of Microbiology, Department Pathobiology, University of Veterinary Medicine Vienna, Veterinärplatz 1, 1210 Vienna, Austria

<sup>2</sup> Department of Bacteriology and Toxinology, Bundeswehr Institute of Microbiology, Neuherbergstrasse 11, 80937 Munich, Germany

<sup>3</sup> Chair of Food Chemistry and Molecular Sensory Science, Technical University of Munich, Lise-Meitner-Straße 34, 85354 Freising, Germany

\* Correspondence: monika.ehling-schulz@vetmeduni.ac.at (M.E.S.)

† Current address: Institute of Molecular Biotechnology of the Austrian Academy of Sciences (IMBA), Vienna BioCenter (VBC), Dr. Bohr-Gasse 3, 1030 Vienna, Austria.

†† Current address: Dr. Brill + KEBOS GmbH & Co.KG—Institute for Hygiene and Microbiology, Grützmühlenweg 48, 22339 Hamburg, Germany

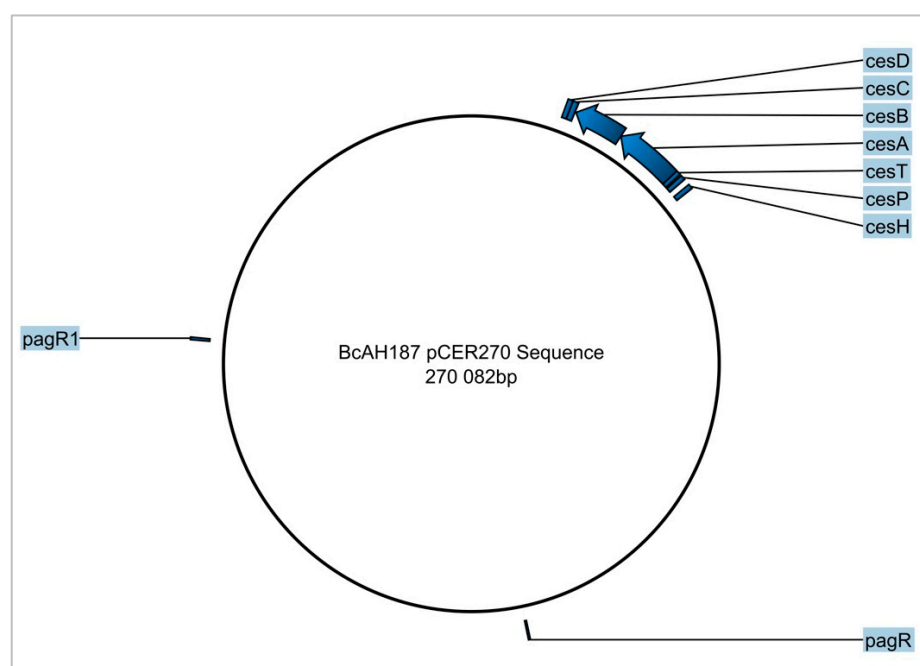

**Figure S1.** Location of *pagR* homologs on pCER270 of emetic *B. cereus*. Plasmid map of the pCER270 megaplasmid of the emetic reference strain F4810/72 (also known as AH187) depicting the genomic location of BcAH187\_RS28375 and BcAH187\_RS28695, predicted to encode ArsR/SmtB family proteins. Due to their homology to the transcriptional regulator *pagR* (see figure 1), encoded on the pXO1 toxin plasmid in *B. anthracis*, they have been designated as *pagR* and *pagR1* respectively. In addition, the *ces* gene, encoding the non ribosomal peptide synthetase CesNRPS responsible for biosynthesis of the cereulide toxin [20], is indicated. The plasmid map was generated with the CLC Workbench Qiagen Software.

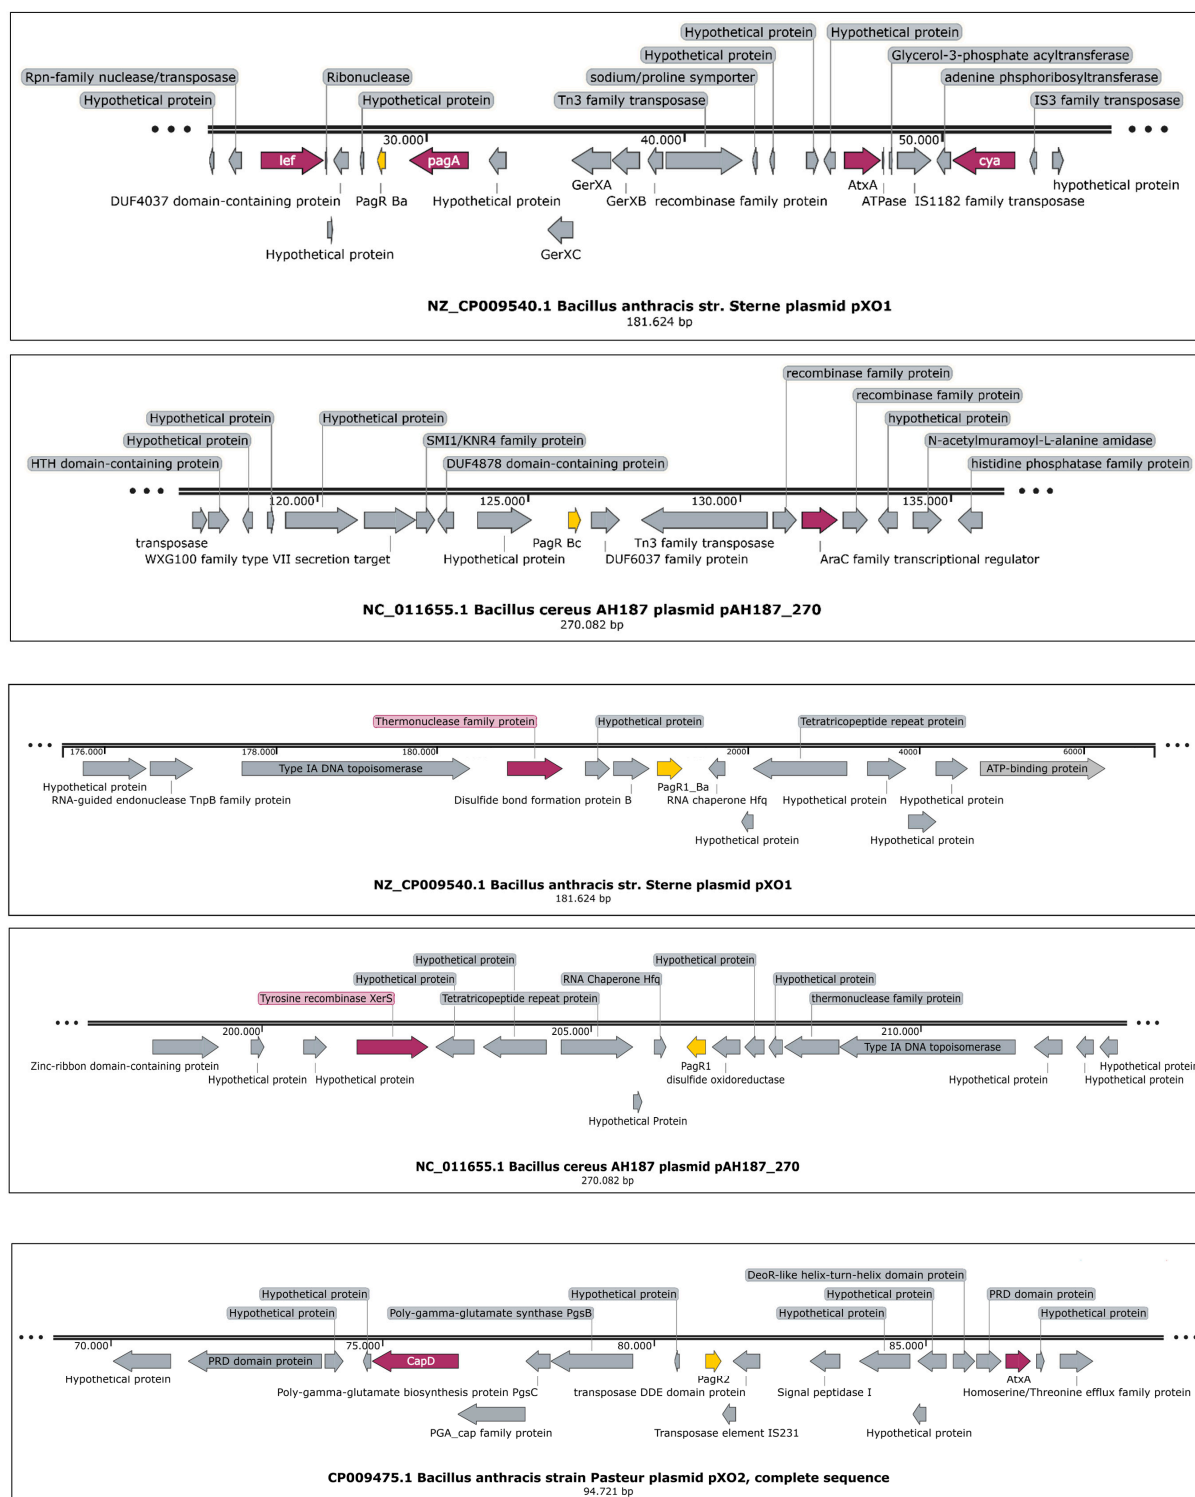

**Figure S2.** Genetic localization of the *pagR* homologues of emetic *B. cereus* F4810/72 (NC\_011655.1) and *B. anthracis* Sterne strain pXO1 plasmid (CP009540.1), Pasteur Strain pXO2 plasmid (CP009475.1). Genes/Proteins are labelled with arrows based on their orientation on their plasmid. The *pagR* genes from *B. cereus* and *B. anthracis* are marked with a yellow arrow. Construction was performed with SnapGene Software (GSL Biotech, USA).

|                         |       | emetic <i>B. cereus</i> |      |     |    |       |       |     |    | <i>B. anthracis</i> |       |     |    |       |       |     |      |       |       |     |    |
|-------------------------|-------|-------------------------|------|-----|----|-------|-------|-----|----|---------------------|-------|-----|----|-------|-------|-----|------|-------|-------|-----|----|
|                         |       | PagR                    |      |     |    | PagR1 |       |     |    | PagR                |       |     |    | PagR1 |       |     |      | PagR2 |       |     |    |
| emetic <i>B. cereus</i> | PagR  | 100%                    | 100% | 493 | 0% | 54.5% | 73.7% | 279 | 2% | 63.6%               | 78.8% | 327 | 0% | 55.6% | 74.7% | 281 | 2%   | 60.6% | 77.8% | 309 | 0% |
|                         | PagR1 |                         |      |     |    | 100%  | 100%  | 485 | 0% | 51.5%               | 63.6% | 237 | 2% | 95.9% | 99.0% | 472 | 0%   | 49.5% | 67.7% | 225 | 2% |
| <i>B. anthracis</i>     | PagR  |                         |      |     |    |       |       |     |    | 100%                | 100%  | 503 | 0% | 51.5% | 63.1% | 236 | 9.7% | 70.7% | 81.8% | 363 | 0% |
|                         | PagR1 |                         |      |     |    |       |       |     |    |                     |       |     |    | 100%  | 100%  | 488 | 0%   | 49.5% | 67.7% | 223 | 2% |
|                         | PagR2 |                         |      |     |    |       |       |     |    |                     |       |     |    |       |       |     |      | 100%  | 100%  | 506 | 0% |

**Figure S3.** Protein sequence homology of all PagR homologues of emetic *B. cereus* and *B. anthracis* strains. Identity (1st value), Similarity (2nd value), score (3rd value) and gaps (4th value) are illustrated. This analysis was based on EMBOSS Needle algorithm, the pairwise sequence alignment of proteins. The NCBI locus tag in *B. cereus* for PagR1Bc is BCAA187\_RS28695, for PagRBc is BCAA187\_RS28375. For *B. anthracis*, the NCBI locus tag is for PagRBa AW20\_RS00175 [Sterne Strain], GBAA\_RS29115 [Ames Ancestor], for PagR1Ba: AW20\_RS00020 [Sterne Strain] and GBAA\_RS29270 [Ames Ancestor]; for PagR2\_Ba, the NCBI locus tag is BF26\_RS00405 [Pasteur Strain] and GBAA\_RS28255 [Ames Ancestor].

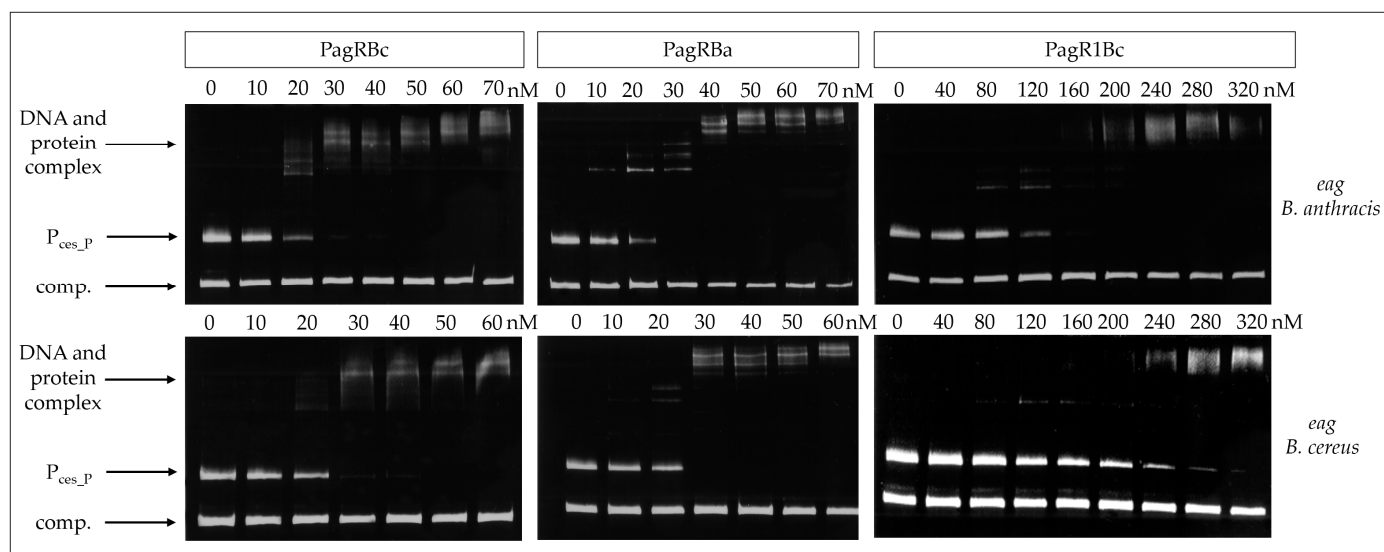

**Figure S4.** Gel mobility shift assay to determine the *in vitro* affinity of PagR homologs (PagR1Bc, PagRBc and PagRBa) to the *eag* gene promoter region of *B. cereus* and *B. anthracis*. The promoter of the S-layer protein Eag, which is one of the main targets for PagR in *B. anthracis*, served as positive control for the EMSA experiments. Similar to PagR from *B. anthracis*, binding of PagR homologs to the *eag* promoter of *B. anthracis* (*eag* Ba) and emetic *B. cereus* F4810/72 (*eag* Bc) was observed *in vitro* using different amounts of DNA comprising the promoter region of the *ces* operon and equimolar amounts of a competitive negative control DNA fragment (comp.), respectively. Note: PagR from *B. anthracis* and PagR from *B. cereus* showed a comparable binding affinity for the *eag* promoter of *B. anthracis* and emetic *B. cereus*, while the binding affinity of PagR1 was much lower. A representative result from three independent experiments is shown.

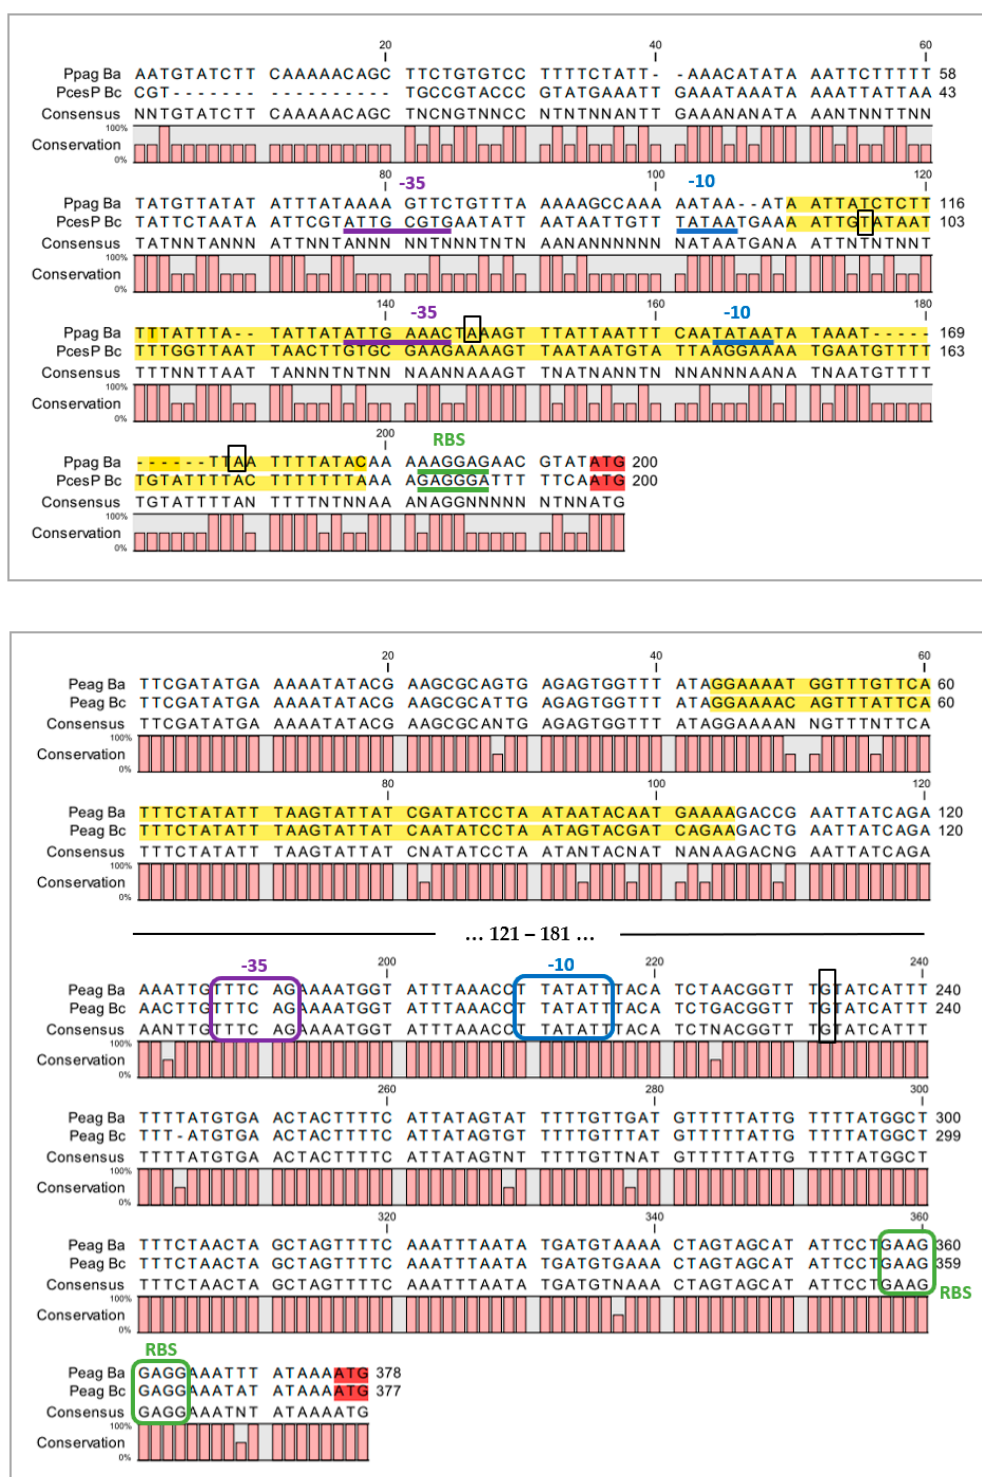

**Figure S5.** Alignment of the promoter regions  $P_{cesP}$  (Bc) and  $P_{pag}$  (Ba), as well as the regions of  $P_{eag}$  (Bc) and  $P_{eag}$  (Ba) are shown. Transcription start sites (+1) are boxed in black. Putative ribosome binding site (RBS) and putative -10 and -35 recognition sites are indicated in colored boxes. Translation start sites are marked in red. The *pagR* binding sites are marked in yellow [15].

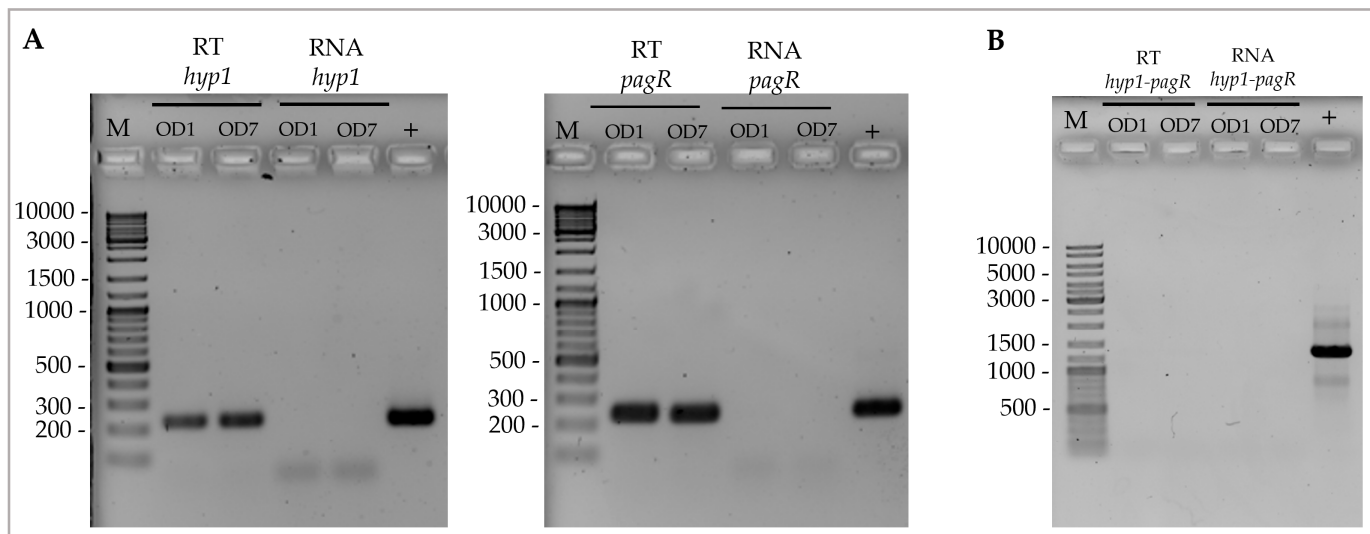

**Figure S6.** Test of transcription of *pagRbc* and the hypothetical gene, designated *hyp1*, in the 5' proximity of *pagRbc*. RT-PCR, using internal primers of *hyp1* (qhyp1\_F / qhyp1\_R) and *pagRbc* (qpagR\_F / qpagR\_R), showed that both genes are transcribed at OD<sub>600</sub> of 1 and 7 (A). However, there were no transcripts from a forward primer in *hyp1* and reverse primer in *pagRbc* (qhyp1F / qpagR\_R), indicating that both genes are independently transcribed (B). Negative controls (RNA, -) and positive controls (gDNA, +). M: marker ladder mixture (O'GeneRuler DNA Ladder Mix).

**Table S1.** Oligonucleotides used in this study. The sequence of the restriction enzymes is underlined, respectively.

| Primer designation                                                            | Primer sequence (5' → 3')                    | Reference  |
|-------------------------------------------------------------------------------|----------------------------------------------|------------|
| <b>Construction of <i>E. coli</i> His6-tag protein overexpression strains</b> |                                              |            |
| pET28b_for                                                                    | TTAATACGACTCACTATAGGGG                       | Novagen    |
| pET28b_rev                                                                    | GCTAGTTATTGCTCAGCGG                          | Novagen    |
| PagRBcNco_F                                                                   | GTT <u>CCATGG</u> CTATGACAAGTTTTGCGA         | This study |
| PagRBcXho_R                                                                   | TT <u>CTCGAG</u> TGTAACGGTCCTAATAAC          | This study |
| PagR1BcNde_F                                                                  | CTC <u>CATATG</u> ACAACCTATTCAAGCAAGTAATGA   | This study |
| PagR1BcXho_R                                                                  | CAC <u>CTCGAG</u> GCTATTTAATTTGAGGTATTT      | This study |
| PagRBaNco_F                                                                   | GCT <u>CCATGG</u> CTATGACAGTATTTGTAG         | This study |
| PagRBaXho_R                                                                   | TG <u>CTCGAG</u> TTGGATAGGGTTTAACAAC         | This study |
| <b>EMSA studies</b>                                                           |                                              |            |
| cesPII_for (size 523 bp)                                                      | CTTCTTCAACGTGTGCTTCTA                        | [22]       |
| cesPII_rev (size 523 bp)                                                      | GTGTTTCATTGAAAAATCCCTC                       | [22]       |
| EMSAunsp7_for (size 301 bp)                                                   | ATGGTGGCGGAGTAAGTGGTTGGA                     | [22]       |
| EMSAunsp7_rev (size 301 bp)                                                   | AAAGGAATCGGTTTAACCAACGCACTG                  | [22]       |
| EMSAunsp8_for (size 201 bp)                                                   | GAACATTATTTTTCGCGAGAACGAG                    | [22]       |
| EMSAunsp8_rev (size 201 bp)                                                   | TATTGGCGTTCTTGTCTGTGAA                       | [22]       |
| <b>BACTH studies</b>                                                          |                                              |            |
| PagR1Bc_384F_PstI                                                             | AATTT <u>CTGCAGG</u> ATGACAACCTATTCAAGCAAG   | This study |
| PagR1Bc_385R_XbaI                                                             | AAATT <u>TCTAGAG</u> TTAAACCTAGTACACTAACAATC | This study |
| PagR1Bc_386F_PstI                                                             | AATTT <u>CTGCAGG</u> GATGACAACCTATTCAAGCAAG  | This study |
| PagRBc_387F_PstI                                                              | AATTT <u>CTGCAGG</u> ATGACAAGTTTTGCGAATC     | This study |
| PagRBc_388R_XbaI                                                              | AAATT <u>TCTAGAG</u> TTTTGTAACGGTCCTAATAACC  | This study |
| PagRBc_389F_PstI                                                              | AATTT <u>CTGCAGG</u> GATGACAAGTTTTGCGAATC    | This study |
| PagRBa_390F_PstI                                                              | AATTT <u>CTGCAGG</u> ATGACAGTATTTGTAGATCAT   | This study |
| PagRBa_391R_XbaI                                                              | AAATT <u>TCTAGAG</u> TTTTGGATAGGGTTTAACAAC   | This study |
| PagRBa_392F_PstI                                                              | AATTT <u>CTGCAGG</u> GATGACAGTATTTGTAGATCAT  | This study |
| <b>Construction of <i>pagR</i> single knockout mutant</b>                     |                                              |            |
| CmEcoRI_F                                                                     | G <u>GAAATTC</u> GGTTTTATCTTCGAGGATGC        | This study |
| CmEcoRI_R                                                                     | G <u>GAAATTC</u> CGGGGCAGGTTAGTGAC           | This study |
| M13-F                                                                         | GTAAAACGACGGCCAG                             | universal  |
| M13-R                                                                         | CAGGAAACAGCTATGAC                            | universal  |
| pagRF11Kpn_F                                                                  | TGATT <u>GGTACCC</u> GGTATATGGGAACCTGAGC     | This study |

|              |                                      |            |
|--------------|--------------------------------------|------------|
| pagRF1Sac_R  | TGATTGAGCTCGCTCTACATCCTCTTCTAAAATC   | This study |
| pagRF12Xho_F | TGATTCTCGAGGGGAAGGTTATAAGAGGTAATCGTC | This study |
| pagRF12Xba_R | TGATTCTAGAGCATTTCCTGACGGGAC          | This study |
| pagRK1_F     | GCAGGGTAGCTATGATTCCTGC               | This study |
| pagRK1_R     | CTCTCCGTCGCTATTGTAACCAG              | This study |
| pagRK2_F     | GTGATGGTTATCATGCAGGA                 | This study |
| pagRK2_R     | GCTCATCTTTTGGTGTACGC                 | This study |

### Construction of *PagR* homolog complemented strains

|                   |                                           |            |
|-------------------|-------------------------------------------|------------|
| pWH1520_F         | GTTCACTTAAATCAAAGGGG                      | This study |
| pWH1520_R         | GTCGGATCAATTCATCGATA                      | This study |
| pWHpagRBc_BcuI-F  | GAACTAGTATGACAAGTTTTGCGAATCA              | This study |
| pWHpagRBc_PaeI-R  | CAGCATGCAATATTTTATTGTAACGGTC              | This study |
| pWHpagR1Bc_BcuI-F | GCACTAGTAAAAATGACAACTATTCAAGCA            | This study |
| pWHpagR1Bc_PaeI-R | TCGCATGCTTATAAACCTAGTACACTAAC             | This study |
| pWHpagRBa_BcuI-F  | TGATTACTAGTGCTATGACAGTATTTGTAGATCAT       | This study |
| pWHpagRBa_PaeI-R  | AATCAGCATGCGAGGTAATTATATAAAATCTATTGGATAGG | This study |

### RT-PCR

|         |                              |            |
|---------|------------------------------|------------|
| 16S A1  | GGAGGAAGGTGGGGATGACG         | [54]       |
| 16S A2  | ATGGTGTGACGGGCGGTGTG         | [54]       |
| qcesB_F | TTAGATGGTATTCTTCACTTGGC      | [17]       |
| qcesB_R | TTGATACAAATCGCATTCTTATAACC   | [17]       |
| qhyp1_F | CATGTTTACAGTGTCATAGGAGATAC   | This study |
| qhyp1_R | CAGTCATATAATCTCCATACATATTCC  | This study |
| qpagR_F | GACAAGTTTTCGGAATCAACACGTAG   | This study |
| qpagR_R | CCTTGACGATTACCTCTTATAACCTTCC | This study |

**Table S2.** Plasmids used in this study.

| Plasmid         | Relevant genotype or characteristics                                                                                                                                                                                                                                                                                                                   | Reference or source |
|-----------------|--------------------------------------------------------------------------------------------------------------------------------------------------------------------------------------------------------------------------------------------------------------------------------------------------------------------------------------------------------|---------------------|
| pCR 2.1 TOPO    | General cloning vector, Amp <sup>r</sup> , Kan <sup>r</sup>                                                                                                                                                                                                                                                                                            | Invitrogen          |
| pCR 2.1 TOPO/Cm | Cloning vector from Invitrogen with additional Chloramphenicol Cassette cm <sup>r</sup> ; amp <sup>r</sup> , kan <sup>r</sup>                                                                                                                                                                                                                          | This study          |
| pAT113          | Suicide vector carrying the origin of IncP plasmids RK2 in order to allow conjugational transfer to gram-positive bacteria by <i>E. coli</i> strains with IncP plasmids, such as <i>E. coli</i> pRK24, <i>oriR</i> pACYC184, <i>oriT</i> RK24, Tra <sup>+</sup> , Mob <sup>+</sup> , <i>attTN1545</i> , MCS pUC19, kan <sup>r</sup> , erm <sup>r</sup> | [52]                |
| pAD123          | <i>B. cereus</i> – <i>E. coli</i> shuttle vector containing <i>gfpmut3A</i> , amp <sup>r</sup> , cm <sup>r</sup>                                                                                                                                                                                                                                       | [51]                |

|                 |                                                                                                                                                       |                          |
|-----------------|-------------------------------------------------------------------------------------------------------------------------------------------------------|--------------------------|
| pWH1520         | <i>Bacillus</i> sp. expression vector, xylose inducible; amp <sup>r</sup> , tetr <sup>r</sup>                                                         | [53]                     |
| pWH::pagRBc     | Promoter less <i>pagR</i> of emetic <i>B. cereus</i> <sup>1</sup> in pWH1520, amp <sup>r</sup> , tetr <sup>r</sup>                                    | This study               |
| pWH::pagR1Bc    | Promoter less <i>pagR1</i> of emetic <i>B. cereus</i> <sup>1</sup> in pWH1520, amp <sup>r</sup> , tetr <sup>r</sup>                                   | This study               |
| pWH::pagRBa     | Promoter less <i>pagR</i> of <i>B. anthracis</i> <sup>2</sup> in pWH1520, amp <sup>r</sup> , tetr <sup>r</sup>                                        | This study               |
| pET28b(+)       | <i>E. coli</i> expression vector, T7 lac promoter, His <sub>6</sub> tag; kan <sup>r</sup>                                                             | Novagen                  |
| pET28b::pagR1Bc | Promoter less <i>pagR1</i> of emetic <i>B. cereus</i> <sup>1</sup> with N-terminal His <sub>6</sub> tag in pET28b, kan <sup>r</sup>                   | This study               |
| pET28b::pagRBc  | Promoter less <i>pagR</i> of <i>B. cereus</i> <sup>1</sup> with C-terminal His <sub>6</sub> tag in pET28b, kan <sup>r</sup>                           | This study               |
| pET28b::pagRBa  | Promoter less <i>pagR</i> of <i>B. anthracis</i> <sup>2</sup> with C-terminal His <sub>6</sub> tag in pET28b, kan <sup>r</sup>                        | This study               |
| pKT25           | BACTH expression vectors, T25 fragment of <i>cya</i> expressed from lac promoter, MCS is inserted at the 3' end (N-terminus) of T25, kan <sup>r</sup> | Euromedex Cat No: EUK001 |
| pKNT25          | BACTH expression vectors, T25 fragment of <i>cya</i> expressed from lac promoter, MCS is inserted at the 5' end (C-terminus) of T25, kan <sup>r</sup> | Euromedex Cat No: EUK001 |
| pUT18           | BACTH expression vectors, T18 fragment of <i>cya</i> expressed from lac promoter, MCS is inserted at the 5' end (C-terminus) of T25, amp <sup>r</sup> | Euromedex Cat No: EUK001 |
| pUT18c          | BACTH expression vectors, T18 fragment of <i>cya</i> expressed from lac promoter, MCS is inserted at the 3' end (N-terminus) of T25, amp <sup>r</sup> | Euromedex Cat No: EUK001 |
| pUT::pagRBc     | <i>pagR</i> emetic <i>B. cereus</i> <sup>1</sup> inserted in frame with T18 fragment of <i>cya</i> , amp <sup>r</sup>                                 | This study               |
| pUT::pagR1Bc    | <i>pagR1</i> of emetic <i>B. cereus</i> <sup>1</sup> inserted in frame with T18 fragment of <i>cya</i> , amp <sup>r</sup>                             | This study               |
| pUT::pagRBa     | <i>B. anthracis pagR</i> inserted in frame with T18 fragment of <i>cya</i> , amp <sup>r</sup>                                                         | This study               |
| pUTC::pagRBc    | <i>pagR</i> emetic <i>B. cereus</i> <sup>1</sup> inserted in frame with T18 fragment of <i>cya</i> , amp <sup>r</sup>                                 | This study               |
| pUTC_pagR1Bc    | <i>pagR1</i> emetic <i>B. cereus</i> <sup>1</sup> inserted in frame with T18 fragment of <i>cya</i> , amp <sup>r</sup>                                | This study               |
| pUTC_pagRBa     | <i>B. anthracis pagR</i> inserted in frame with T18 fragment of <i>cya</i> , amp <sup>r</sup>                                                         | This study               |
| pKT::pagRBc     | <i>pagR</i> emetic <i>B. cereus</i> <sup>1</sup> inserted in frame with T25 fragment of <i>cya</i> , kan <sup>r</sup>                                 | This study               |
| pKT::pagR1Bc    | <i>pagR1</i> emetic <i>B. cereus</i> <sup>1</sup> inserted in frame with T25 fragment of <i>cya</i> , kan <sup>r</sup>                                | This study               |
| pKT::pagRBa     | <i>B. anthracis pagR</i> inserted in frame with T25 fragment of <i>cya</i> , kan <sup>r</sup>                                                         | This study               |
| pKNT::pagRBc    | <i>pagR</i> emetic <i>B. cereus</i> <sup>1</sup> inserted in frame with T25 fragment of <i>cya</i> , kan <sup>r</sup>                                 | This study               |
| pKNT::pagR1Bc   | <i>pagR1</i> emetic <i>B. cereus</i> <sup>1</sup> inserted in frame with T25 fragment of <i>cya</i> , kan <sup>r</sup>                                | This study               |
| pKNT::pagRBa    | <i>B. anthracis pagR</i> inserted in frame with T25 fragment of <i>cya</i> , kan <sup>r</sup>                                                         | This study               |

<sup>1</sup> Abbreviation of *B. cereus* is Bc.<sup>2</sup> Abbreviation of *B. anthracis* is Ba.
